# Supplementary material
Source: PubMed Central journal article supplement (PMC2492639)
Supplement: pp.108.118364_1.pdf [file pp.108.118364_1.pdf]

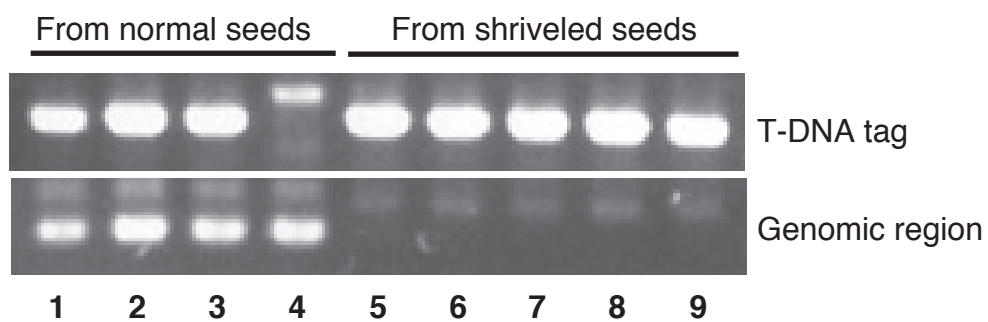

**Supplemental Figure 1:** A genomic PCR experiment showing that all plants derived from shriveled seeds of GABI\_584D09 were homozygous. Genomic DNA was individually isolated from plants derived from shriveled seeds (lane 5-9) and normal seeds (lane 1-4) in the F2 generation of GABI\_584D09. A primer set amplifying between the neighboring genomic region and the left border of the T-DNA was used for detection of a T-DNA insertion (showing a T-DNA tag). For showing the absence of a T-DNA insertion, a primer set amplifying between both sides of the neighboring genomic region of the T-DNA was used (showing the genomic region).
